# Supplementary material for: Elucidating Novel Targets for Ovarian Cancer Antibody–Drug Conjugate Development: Integrating In Silico Prediction and Surface Plasmon Resonance to Identify Targets with Enhanced Antibody Internalization Capacity
Source: MDPI journal article supplement (doi:10.3390/antib12040065), 2023-10-16
Supplement: s1 [file s1]

**Figure S1**

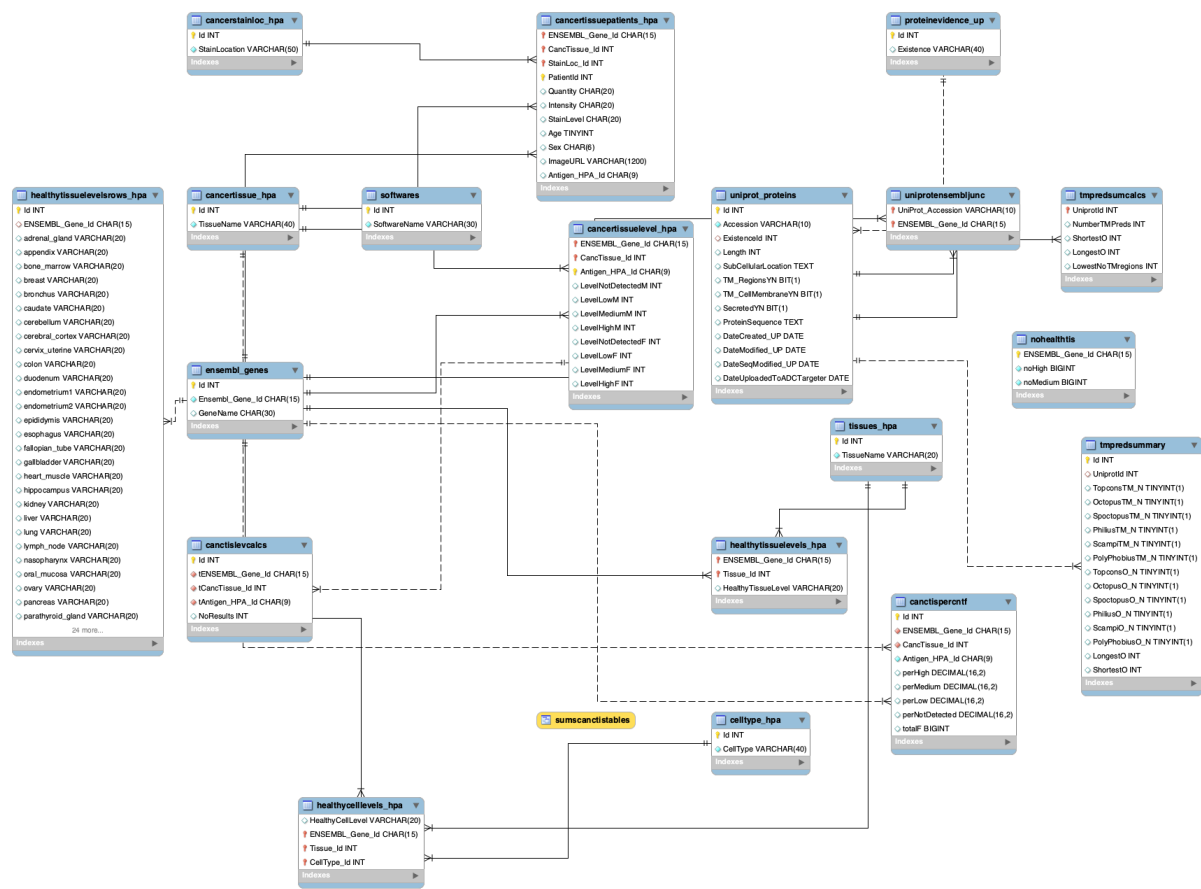

**Figure S1. ADC Target Vault Database Schema**

This is a diagram of the database schema used in the study. The following link connects to its GitHub page <https://github.com/RBGOLab/ADC-database-generation-scripts> (link created on 15<sup>th</sup> of September 2023) .

Figure S2.

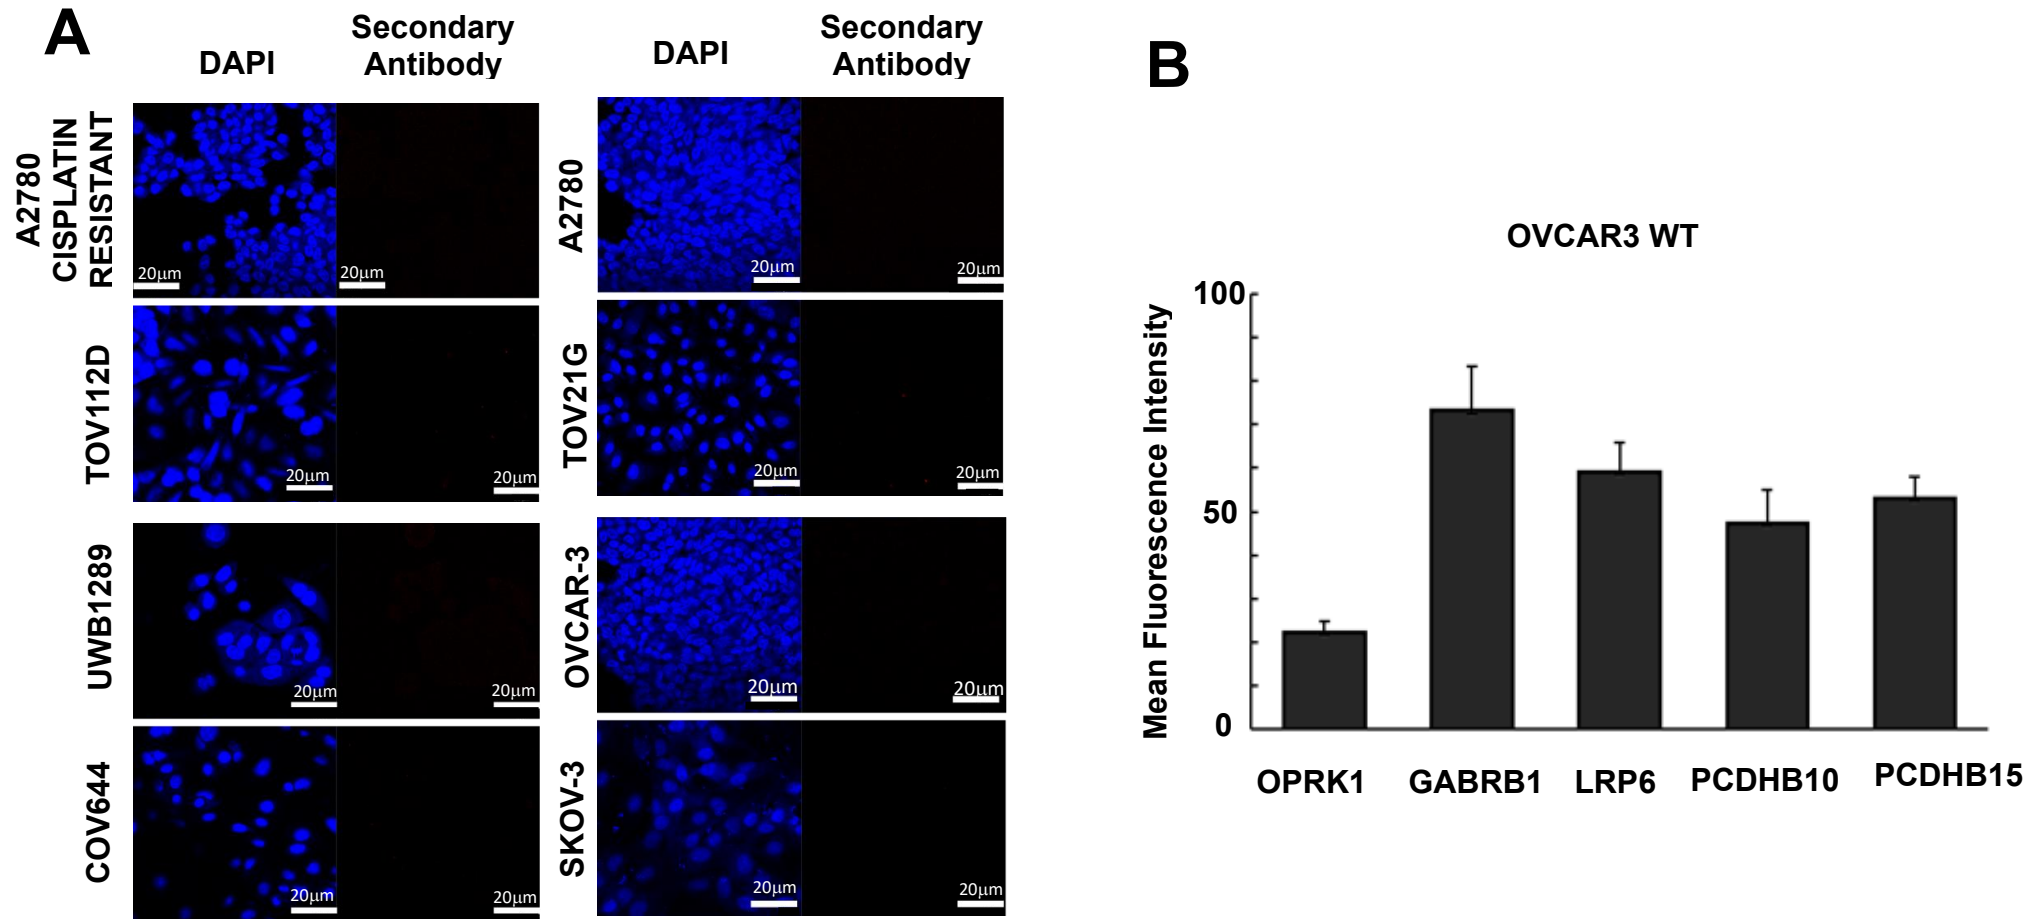

**Figure S2: A)** Controls for immunofluorescence assay using monolayers. Ovarian cancer cell lines were cultured as 2D monolayers in 8 well chamber slides and stained with nuclei marker (DAPI) and secondary antibody. Magnification: 40 $\times$ , Scale bars: 20  $\mu$ m. **B)** Quantitative analysis of target fluorescence intensity in OVCAR3 WT cells was determined using ImageJ. Data are represented as a mean of 40 individual cells under different conditions. Data are  $\pm$  SD.

Figure S3.

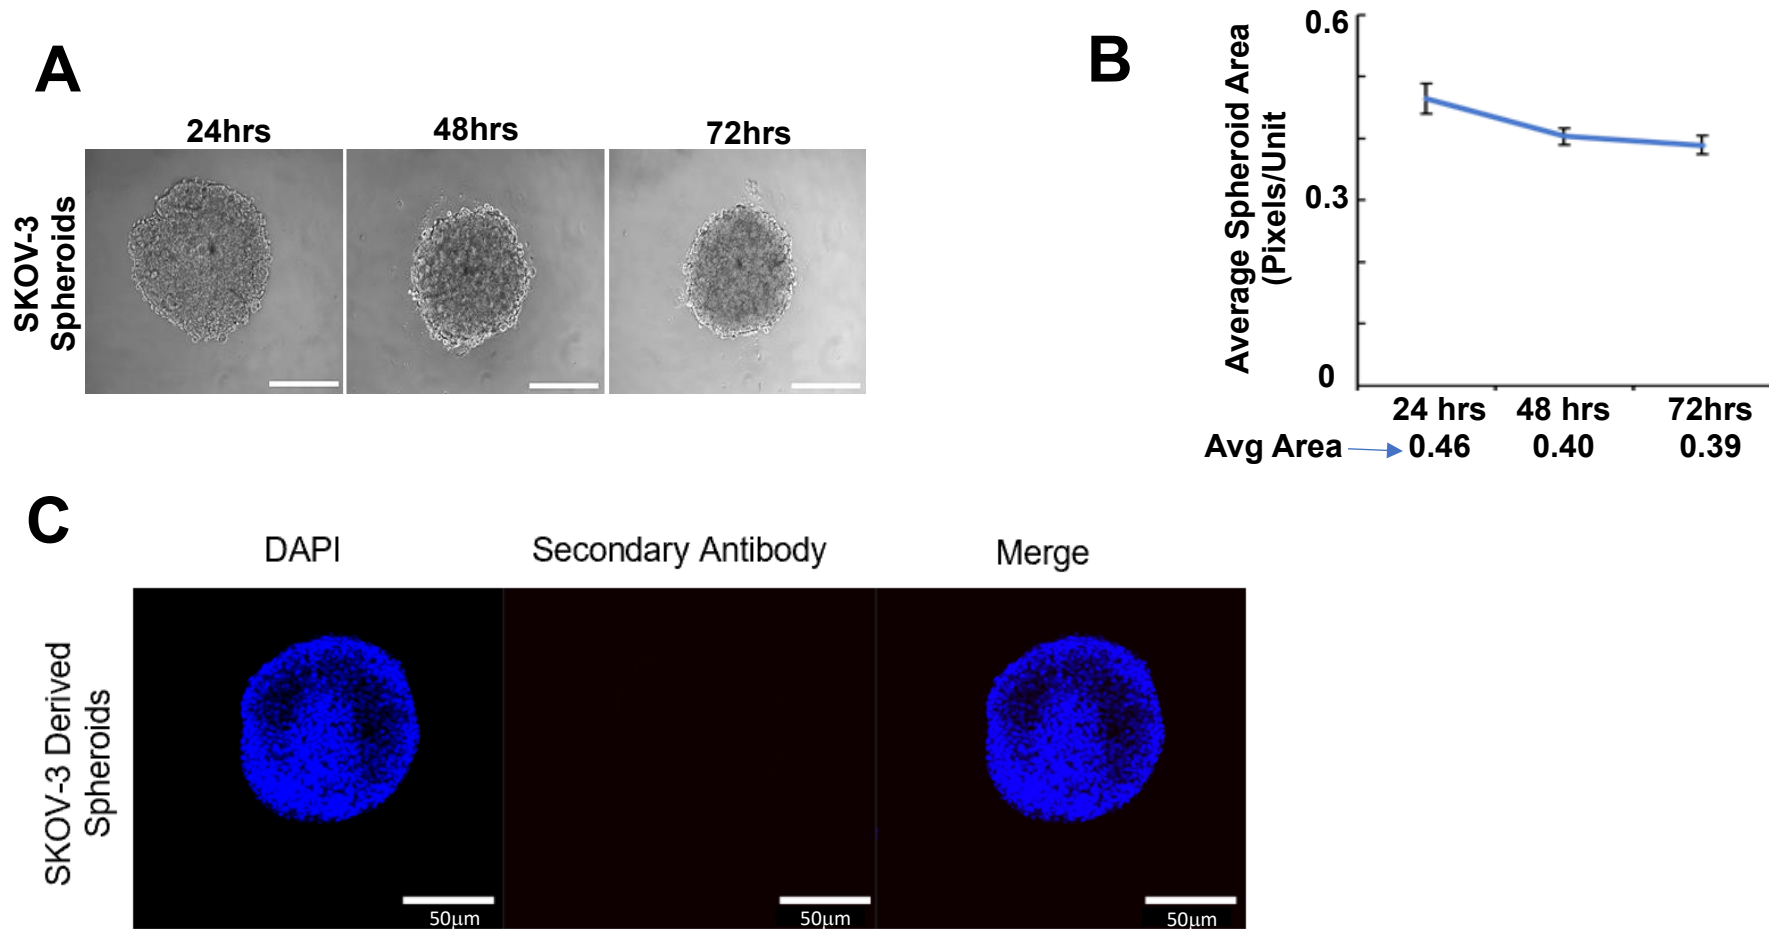

**Figure S3:** SKOV3 spheroid formation and immunofluorescence controls **A)** Representative brightfield micrographs of SKOV-3 derived spheroids for 24 – 72 hours. Spheroid formation was observed using live cell microscopy. Cells aggregated into a spheroid-like structure 24hrs post-culture and became more compact with clear boundaries at 72 hrs. **B)** quantification of brightfield images. **C)** SKOV3 spheroids were grown via liquid overlay method and stained with nuclei marker (DAPI) and secondary antibody. Magnification: 40×, Scale bars: 50  $\mu$ m.

Figure S4.

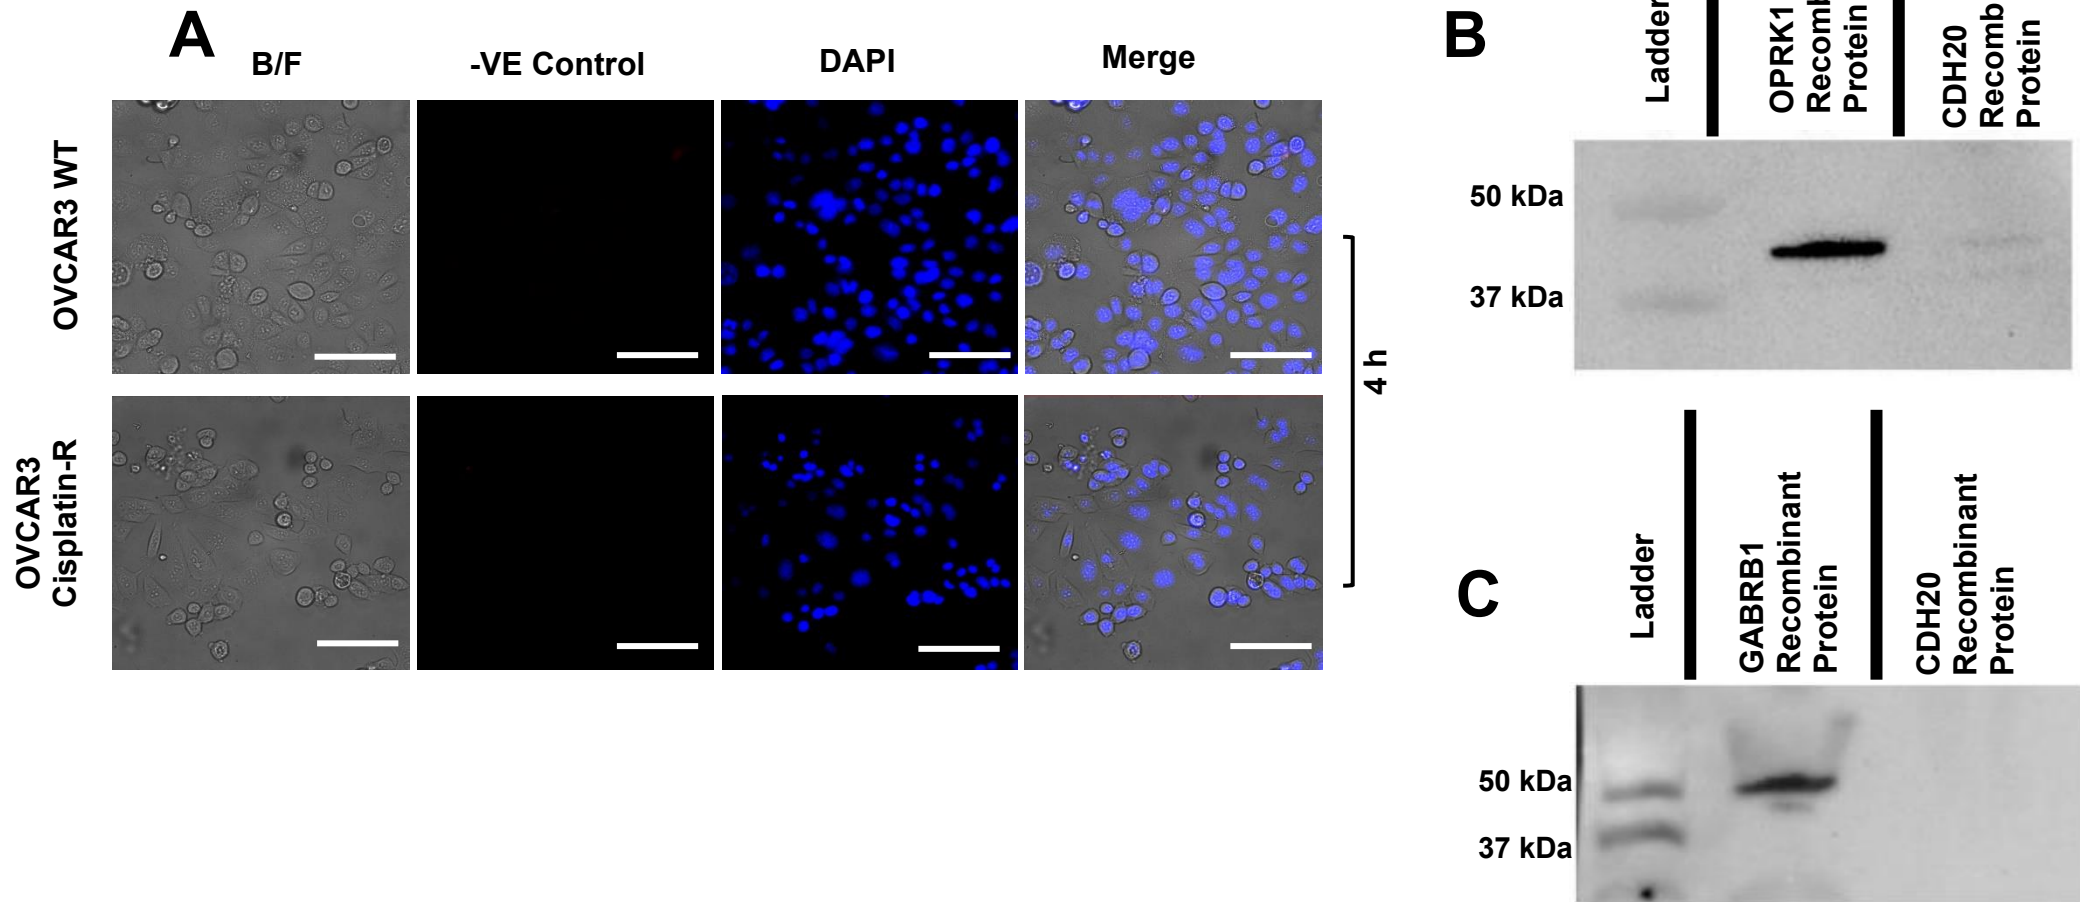

**Figure S4:** Internalisation controls and Recombinant protein detection. **A)** OVCAR3 WT and cisplatin resistant cell lines were cultured as 2D monolayers and treated for 4h with pH sensitive dye only. Cells were stained with nuclei marker (DAPI) and secondary antibody. Magnification: 40×, Scale bars: 20  $\mu$ m. Specificity of OPRK1 and GABRB1 antibodies was tested using 15ng of the targets recombinant proteins **B)** rOPRK1 & **C)** rGABRB1 respectively and equal amounts of recombinant rCDH20 protein (-ve), used as a negative control.

### Supplementary Table S1

Description of the data sources which we used to create the “ADC Target Vault” database

| Database            | URL                                                                                                | Description                                                                                                                                  |
|---------------------|----------------------------------------------------------------------------------------------------|----------------------------------------------------------------------------------------------------------------------------------------------|
| ENSEMBL             | <a href="https://www.ensembl.org">https://www.ensembl.org</a><br>(accessed 12.11.2018)             | Genome browser for vertebrate genomes with annotations                                                                                       |
| UniProt             | <a href="https://www.uniprot.org/">https://www.uniprot.org/</a><br>(accessed 12.11.2018)           | Database of protein sequences and functional information                                                                                     |
| Human Protein Atlas | <a href="https://www.proteinatlas.org/">https://www.proteinatlas.org/</a><br>(accessed 12.11.2018) | Database mapping proteins in cells, tissues and organs from various omics, imaging and mass-spec technologies for healthy and disease states |
| TopCon              | <a href="https://topcons.cbr.su.se/">https://topcons.cbr.su.se/</a><br>(accessed 28/01.2019)       | Webserver for consensus transmembrane prediction results from 6 different computational tools                                                |

**Table S2**

List of tables that are in the ADC Target Vault database, together with a description of the data that each table contains.

| <b>Table</b>                | <b>Description</b>                                                                                  |
|-----------------------------|-----------------------------------------------------------------------------------------------------|
| cancerstainloc_hpa          | Cellular location of cells from HPA                                                                 |
| cancertissue_hpa            | List of cancer tissues in the HPA                                                                   |
| cancertissuelevel_hpa       | Summary table with number of patients with low/medium/high levels of stain from IHC images from HPA |
| cancertissuepatients_hpa    | Patient wise IHC image data from HPA                                                                |
| cantislevalcs               | Levels available for cancer tissue from IHC images                                                  |
| cantispercntf               | Gene wise percentage of cancer IHC images with stain level                                          |
| celltype_hpa                | List of cell types from HPA                                                                         |
| ensembl_genes               | ENSEMBL genes and gene symbols                                                                      |
| healthycellevels_hpa        | Protein expression levels in healthy cells from HPA                                                 |
| healthytissuelevels_hpa     | Protein expression levels in tissue from HPA                                                        |
| healthytissuelevelsrows_hpa | Swap rows and columns from healthytissuelevels_hpa table                                            |
| nohealthtis                 | Gene wise number of tissues with high or medium expression levels in healthy tissues from HPA       |
| proteinevidence_up          | Levels available for protein evidence in UniProt                                                    |
| softwares                   | List of transmembrane prediction tools used                                                         |
| tissues_hpa                 | Tissues available in HPA                                                                            |
| tmpredsumcalcs              | Protein wise summary of transmembrane predictions from transmembrane prediction tools               |
| tmpredsummary               | Protein wise summary of transmembrane                                                               |
| uniprot_proteins            | Protein data from Uniprot                                                                           |
| uniprotensembljun           | Junction table for linking UniProt IDs with ENSEMBL gene IDs                                        |

**Table S3: List of antibodies used for the current study.**

| Primary Antibody                     | Manufacturer  | Ab Type           | SPR    | Antibody Dilutions |          |             |
|--------------------------------------|---------------|-------------------|--------|--------------------|----------|-------------|
|                                      |               |                   |        | Western Blot       | Confocal | InCell 6000 |
| <b>Anti-LRP6<br/>(N-Terminus)</b>    | Sigma-Aldrich | Rabbit Polyclonal | 1:1000 | 1:1000             | 1:50     | 1:50        |
| <b>Anti-PCDHB10<br/>(N-Terminus)</b> | Sigma-Aldrich | Rabbit Polyclonal | 1:1000 | 1:1000             | 1:50     | 1:50        |
| <b>Anti-PCDHB15<br/>(N-Terminus)</b> | Sigma-Aldrich | Rabbit Polyclonal | 1:1000 | 1:1000             | 1:50     | 1:50        |
| <b>Anti-LRP6<br/>(C-Terminus)</b>    | Sigma-Aldrich | Rabbit Polyclonal | N/A    | 1:1000             | N/A      | N/A         |
| <b>Anti-PCDHB10<br/>(C-Terminus)</b> | VWR           | Rabbit Polyclonal | N/A    | 1:1000             | N/A      | N/A         |
| <b>Anti-PCDHB15<br/>(C-Terminus)</b> | Sigma-Aldrich | Rabbit Polyclonal | N/A    | 1:1000             | N/A      | N/A         |
| <b>Anti-OPRK1<br/>(N-Terminus)</b>   | Abcam         | Mouse Polyclonal  | N/A    | 1:1000             | N/A      | N/A         |
| <b>Anti-GABRB1<br/>(N-Terminus)</b>  | Origene       | Rabbit Polyclonal | N/A    | 1:1000             | N/A      | N/A         |
| <b>Anti-OPRK1<br/>(C-Terminus)</b>   | Abcam         | Rabbit Polyclonal | N/A    | 1:1000             | N/A      | N/A         |
| <b>Anti-GABRB1<br/>(C-Terminus)</b>  | Abcam         | Mouse Monoclonal  | N/A    | 1:1000             | N/A      | N/A         |

|                                                                                   |              |                               |     |     |       |       |
|-----------------------------------------------------------------------------------|--------------|-------------------------------|-----|-----|-------|-------|
| <b>Wheat Germ<br/>Agglutinin, Alexa<br/>Fluor™ 488<br/>Conjugate<br/>(W11261)</b> | ThermoFisher | N/A                           | N/A | N/A | 1:700 | 1:700 |
| <b>Wheat Germ<br/>Agglutinin, Alexa<br/>Fluor™ 594<br/>Conjugate<br/>(W11262)</b> | ThermoFisher | N/A                           | N/A | N/A | 1:700 | 1:700 |
| <b>Cross-absorbed<br/>secondary<br/>antibody, Alexa<br/>Fluor 594, A11012</b>     | ThermoFisher | Goat anti-Rabbit IgG<br>(H&L) |     | N/A |       | 1:400 |
| <b>Alexa Fluor 488,<br/>A11001</b>                                                | ThermoFisher | Goat anti-Mouse<br>IgG (H&L)  |     | N/A |       | 1:400 |



**Table S4. Kinetics and general data for LRP6, PCDHB10 and PCDHB15 targets.**

| TARGET         | SPR ANALYSIS<br>(ANTIBODY-<br>ANTIGEN)<br>OFF-RATE<br>SCREENING                               | PROTEIN<br>LOCALIZATION<br>USING WGA | PROTEIN<br>EXPRESSION<br>IN OVARIAN<br>CANCER<br>CELL LINES                | BIOLOGICAL<br>PROCESS                                                                    | BLOOD<br>SPECIFICITY<br>(HPA)      | TISSUE<br>SPECIFICITY     | EXPRESSION<br>IN OTHER<br>CANCER<br>TYPES (HPA)                                        |
|----------------|-----------------------------------------------------------------------------------------------|--------------------------------------|----------------------------------------------------------------------------|------------------------------------------------------------------------------------------|------------------------------------|---------------------------|----------------------------------------------------------------------------------------|
| <b>LRP6</b>    | $k_d=3.98 \times 10^{-4}$ 1/s<br>$k_a=3.68 \times 10^5$ 1/s<br>$K_D=1.08 \times 10^{-9}$ 1/s  | Membrane/<br>Cytoplasmic             | TOV21G,<br>A2780<br>(cisplatin<br>resistant)                               | Wnt Signalling<br>endocytosis                                                            | Naive CD4<br>T-cells               | Low tissue<br>specificity | Ovarian<br>Renal<br>Colorectal<br>Liver<br>Endometrial<br>Prostate<br>Breast           |
| <b>PCDHB10</b> | $k_d=7.19 \times 10^{-5}$ 1/s<br>$k_a=3.64 \times 10^5$ 1/s<br>$K_D=1.98 \times 10^{-10}$ 1/s | Membrane/<br>Cytoplasmic             | A2780<br>(cisplatin<br>resistant),<br>UWB1289<br>UACC1598                  | Involved in the<br>establishment<br>of specific<br>neural<br>connections in<br>the brain | Not detected<br>in immune<br>cells | Low tissue<br>specificity | Liver<br>Testicular<br>Pancreatic<br>Endometrial<br>Urothelial                         |
| <b>PCDHB15</b> | $k_d=8.23 \times 10^{-5}$ 1/s<br>$k_a=1.12 \times 10^5$ 1/s<br>$K_D=7.34 \times 10^{-10}$ 1/s | Membrane/<br>Cytoplasmic             | A2780 (wild<br>type and<br>cisplatin<br>resistant),<br>OVCAR3,<br>UACC1598 | Cell adhesion,<br>establishment<br>of specific<br>neural<br>connections in<br>the brain  | Memory CD8<br>T-cells              | Low tissue<br>specificity | Endometrial<br>Ovarian,<br>Melanoma,<br>Liver,<br>Breast,<br>Colorectal,<br>Pancreatic |
